# Supplementary material for: A sandwich-type photoelectrochemical biosensor based on Ru(bpy)32+ sensitized In2S3 for aflatoxin B1 detection
Source: Royal Society of Chemistry journal article supplement (doi:10.1039/d4an00612g), 2024-01-01
Supplement: d4an00612g1.pdf [file d4an00612g1.pdf]

## Supplementary Information

### A sandwich-type photoelectrochemical biosensor based on $\text{Ru}(\text{bpy})_3^{2+}$ sensitized $\text{In}_2\text{S}_3$ for aflatoxin $\text{B}_1$ detection

Si-Zhe Chen<sup>†</sup>, Jing-Shuai Chen, Xing-Pei Liu<sup>†,\*</sup>, Chang-Jie Mao<sup>†,\*</sup>, Bao-Kang Jin

<sup>†</sup>Key Laboratory of Structure and Functional Regulation of Hybrid Materials (Ministry of Education), Key Laboratory of Chemistry for Inorganic/Organic Hybrid Functionalized Materials of Anhui Province, Key Laboratory of Functional Inorganic Materials of Anhui Province, School of Chemistry & Chemical Engineering, Anhui University, hefei 230601, PR China

\* Corresponding authors E-mail addresses: maochangjie@sina.com (Mao CJ); 414043594@qq.com (Liu XP)

#### Materials and Reagents

Indium nitrate hydrate, selenium dioxide ( $\text{SeO}_2$ ), thioacetamide ( $\text{C}_2\text{H}_5\text{NS}$ ), 3-mercaptopropionic acid (MPA), tris(2,2'-bipyridine)dichlororuthenium(II) hexahydrate ( $\text{Ru}(\text{bpy})_3\text{Cl}_2 \cdot 6\text{H}_2\text{O}$ ), sodium sulfide nonahydrate ( $\text{Na}_2\text{S} \cdot 9\text{H}_2\text{O}$ ), zearalenone (ZEN), aflatoxin  $\text{B}_1$  ( $\text{AFB}_1$ ), potassium chloride (KCl), potassium ferricyanide ( $\text{K}_3\text{Fe}(\text{CN})_6$ ) and L-ascorbic acid (AA) were purchased from Macklin Biochemical Co., Ltd. (Shanghai, China). Sodium dihydrogen phosphate dihydrate ( $\text{NaH}_2\text{PO}_4 \cdot 2\text{H}_2\text{O}$ ) was gained from Sinopharm Chemical Reagent Co., Ltd. (Shanghai, China). Sodium chloride (NaCl) was purchased from Damao Chemical Reagent Factory (Tianjin, China). Potassium ferrocyanide trihydrate ( $\text{K}_4\text{Fe}(\text{CN})_6 \cdot 3\text{H}_2\text{O}$ ) was obtained from Tianjin Guangfu Fine Chemical Research Institute (Tianjin, China). Ochratoxin A (OTA) was obtained from Aladdin Chemistry Co., Ltd. (Shanghai, China). N-hydroxysuccinimide (NHS), 1-ethyl-3-(3-dimethylaminopropyl) carbodiimide (EDC), bovine serum albumin (BSA), disodium phosphate ( $\text{Na}_2\text{HPO}_4$ ), T-2 toxin (T-2) and  $\text{AFB}_1$  antibody were purchased from Shanghai Sangon Biotech Ltd. Co. (Shanghai, China). Indium tin oxide (ITO) electrodes were provided by South China Science &

Technology. The AFB<sub>1</sub> aptamer was synthesized and purified by Shanghai Sangon Biotech Ltd. Co. (Shanghai, China) with the sequence as follows:

AFB<sub>1</sub> aptamer: 5'-NH<sub>2</sub>-C<sub>6</sub>-GTT GGG CAC GTG TTG TCT CTC TGT GTC TCG TGC CCT TCG CTA GGC CC-3'

### **Apparatus**

PEC performance measurement and electrochemical impedance spectroscopy (EIS) were carried out on a CHI 660D electrochemical workstation (CH Instruments, China). The electrolyte used in EIS was a 0.01 M phosphate buffer saline (PBS, pH 7.4) containing 0.1 M of KCl and 2 mM of K<sub>3</sub>[Fe(CN)<sub>6</sub>]/K<sub>4</sub>[Fe(CN)<sub>6</sub>] (1:1), the frequency was ranged from 100 kHz to 0.01 Hz, and the peak-to-peak amplitude of the AC potential was 5 mV. A conventional three-electrode system consisting of a modified ITO working electrode, a Ag|AgCl (saturated KCl) reference electrode, and a platinum wire counter electrode was used. A full-band xenon lamp (Nanjing Yan'an Special Lighting Factory, China) was used as the light source. Scanning electron microscopy (SEM) was carried out using S-4800 microscope (Hitachi, Japan). Transmission electron microscopy (TEM) was carried out using JEM-2100 microscope (JEOL, Japan). X-ray photoelectron spectroscopy (XPS) was performed with an ES-CALAB 250 spectroscopy (Thermo Fisher Ltd, USA). Ultraviolet-visible (UV-vis) spectroscopy was conducted using a UV-3600 spectrometer (Shimadzu Co., Ltd., Japan).

### **PEC measurements**

The photocurrent signal was measured in 0.1 M PBS (pH 7.4) containing 0.1 M AA at the applied potential of 0 V. Tris/EDTA buffer (containing 10 mM Tris-HCl and 1 mM EDTA, pH 7.8-8.2) was utilized to wash the electrode surface after each-step modification to remove any unbound materials. Then, the wet surface of the electrode was dried with nitrogen. The working area of ITO electrode was 0.45 cm<sup>2</sup>. The light source was switched on once every 20 s, and the photocurrent was generated when the electrode surface was subjected to light energy.
